# Supplementary material for: Highly Toughened Nanostructured Self-Assembled Epoxy-Based Material—Correlation Study between Nanostructured Morphology and Fracture Toughness—Impact Characteristics
Source: MDPI journal article supplement (doi:10.3390/polym15071689), 2023-03-28
Supplement: s1 [file s1]

Supporting Document

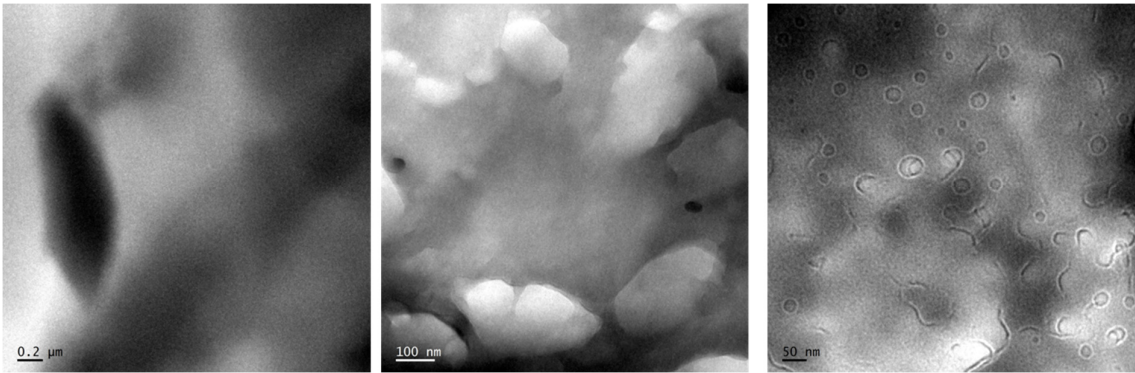

Figure S1. Microlevel to nano level morphology change. (5 to 10 Phr transition).

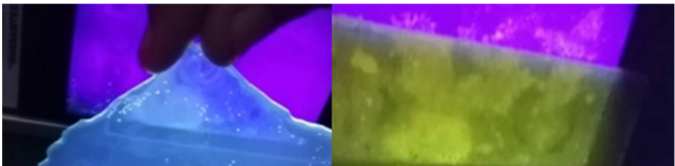

Figure S2. Transparency of Images (Neat epoxy-blue and cured epoxy/eSBS<sub>55</sub>-10 phr blend-Yellow).

Table S1. Data for  $E^l_g$ ,  $E^l_r$  and  $T_g$  of the developed material.

| Sample            | Storage Modulus in the Glassy region ( $E^l_g$ )<br>MPa | Storage Modulus in the Rubbery region ( $E^l_r$ )<br>MPa | $T_g$ (°C) |
|-------------------|---------------------------------------------------------|----------------------------------------------------------|------------|
| Neat epoxy        | 1880                                                    | 86.11                                                    | 172        |
| Epoxy/eSBS-10 phr | 2854                                                    | 92.27                                                    | 153        |

The glass transition temperature of neat epoxy lowered as the addition of second phase to it because of viscoelastic phase separation and RIPS. Storage modulus value increases as the addition of %%% epoxidized SBS into neat epoxy system.
